# Supplementary material for: HydroFATE (v1): A high-resolution contaminant fate model for the global river system
Source: Copernicus journal article supplement (doi:10.5194/egusphere-2023-1590), 2023-07-25
Supplement: Supplementary file [file egusphere-2023-1590-AC3-supplement.pdf]

## Response to Francesco Bregoli (Reviewer 3)

### General comments

### Methodology

#### R3-C1

*The mechanism of water/soil partitioning (or absorption to soil) is complex. Here, the choice of their relative parameters is not process-based. It appears that are from back calculations or calibrations for the specific case of China (Grill et al. 2018) and may be not valid for other areas of the world. I understand that this is difficult for such global scale. But this needs to be better discussed.*

A: We appreciate the thoughtful consideration of the complexities involved in the mechanism of water/soil partitioning and the associated parameter choices. We fully agree that the relative parameters used for the calculation of the direct discharge coefficient may not be universally applicable, as they were derived from a specific case study in China (Grill et al. 2018). While it would certainly be preferable to include region-specific parameter settings, the lack of data to support refinement of such parameters throughout the globe represents, at present, a considerable challenge. In recognition of this, we acknowledge that these uncertainties can substantially impact the outcomes, especially in regions with limited treatment infrastructure (see original manuscript lines 596-609). Nevertheless, we believe that the introduction of the direct discharge coefficient into the model is a crucial design feature and improvement of the model, since in previous large-scale contaminant fate models untreated pathways were not considered at all.

While recognizing the limitations, we would like to reiterate that our study is, in essence, a test of the model on a global scale. The limitations arising from unknown processes and measurement uncertainties are integral to this pioneering effort and set the stage for further refinement, development and future application of the model.

In order to further discuss this issue, as requested, and to reiterate the uncertainty while expressing the importance of the direct discharge coefficient, we added the following text after line 283:

*“While these methods are simplistic in comparison to the real soil processes, no previous large-scale model considers untreated pathways as sources of contaminants, which can be substantial in regions with limited treatment infrastructure.”*

And we also revised and expanded the text at line 601:

*“In fact, Grill et al. (2018) found in a sensitivity analysis for China that the setting of the direct discharge coefficient in rural areas represented the main source of model uncertainties. However, while the simplification of soil-related processes and the determination of their spatially heterogenous parameter settings remain a major challenge and likely source of error, in particular in areas dominated by untreated pathways, these simulations are critically important to be implemented in the model design. For example, in the presented case study, the untreated pathways contributed an estimated 72% of the global emission of sulfamethoxazole, demonstrating their decisive role. Despite the large uncertainties, the baseline scenario was able to reproduce field measurements reasonably well, especially considering the large range of possible values for the direct discharge coefficients (see Table 1). “*

### **R3-C2**

***On-soil and groundwater contaminant degradation are here accounted with a degradation parameter based on the Euclidean distance from hypothetical source point and closer stream. But, groundwater flow does not necessary follow straight lines, but also follows flow directions trough positive gradients related to the local terrain geomorphology. Also, aquifers increase residence time, and therefore degradation. Because you state that the model is not very sensitive to this parameter, why did you add it on your model? This way, it seems that you add unnecessary complexity.***

A: We agree that the hydrological flow path may be closer to reality than Euclidean distance in catchments that are governed by clear topography. But considering the uncertainty inherent in establishing hydrological flow paths at a global scale, including in challenging areas such as floodplains, we decided to simplify the process (it should be noted that in the original model implementation the flow path concept was used, see Grill et al. 2018). However, while the model was not ‘very’ sensitive to this process, we believe that accounting for the relative reduction in contaminant loading into rivers due to the location of population settlements and for variability in drainage density is an important model feature. For example, it may lead to improved simulations for particular regions which may not have been detected in the global sensitivity analysis. By including it in the model design, we hope it can be tested more rigorously in the future.

### **SMX case study and validation**

### **R3-C3**

***SMX has both human and veterinary use. Therefore, it is complex to account only for human uses when validating the model. In the validation, you attempted to focus only on catchments where human use dominates. However, at global scale and with such big basins, this is very difficult.***

A: We fully agree with this comment and acknowledge that to exclude other sources of antibiotics in measurements is virtually impossible, especially for large rivers. Our attempt was only to avoid measurements that explicitly reported in their description that other sources were included, to avoid known cases where measurements and predictions are by default expected to be incomparable. We also noted in the original manuscript that other sources are a possible cause of the negative bias observed in our model results, as discussed in lines 648 to 652. To clarify the methodology used, we changed the explanation regarding the selection of measurements in lines 370 to 374:

*“In order to be selected for inclusion as a MEC in the model evaluation, the literature source must have reported the specific location (i.e., in the form of coordinates, river names, or river intersections) of the measurements. In addition, we discarded any MEC where the literature source explicitly mentioned that the dominant use of antibiotics in the catchment feeding the river was associated with veterinary or industrial activities, since the current version of HydroFATE is not adapted to account for these sources.”*

### **R3-C4**

***You defined several scenarios by changing relevant parameters. However, all parameters choice should be justified. For instance, you discussed the WWTPs removal variability in literature being 2% (min), 49% (ave), 73 (max) based on literature values. What about the other parameters in the different scenarios?***

A: The excretion fractions and the instream decay constants are also based on literature sources, as described in detail in Section 4.1.1, as stated in the manuscript (line 392). The direct discharge coefficients of Scenarios 1 and 2 are taken from the existing study for China (Grill et al. 2018; see line 282)—we added this reference to line 392 (“... and in Grill et al. (2018) for the direct discharge coefficients.”).

This leaves only the direct discharge coefficients for Scenarios 3 and 4 unexplained. Our goal with Scenarios 3 and 4 was to present minimum and maximum predicted concentrations within reasonable parameter variations. Since the direct discharge coefficient is a highly uncertain parameter developed based on a previous study (Grill et al. 2018), it has almost arbitrary variability. For this reason, we selected the values of 0.2 and 0.9 as plausible values that are close to the extremes of 0 and 1, which were analysed in the supplementary scenarios. To clarify this, we added an explanation to line 397:

*“In the absence of relevant literature values, plausible boundaries for the direct discharge coefficients of Scenarios 3 and 4 were set slightly above 0 (with 0 representing complete decay along untreated pathways) and below 1 (representing no decay along untreated pathways).”*

Finally, we rephrased the last statement in the Table caption to add clarity:

*“For parameter settings and configurations see text.”*

### **R3-C5**

***High flow conditions, although favourable for higher dilution, is not considered as extreme low-end scenario.***

A: As also indicated in the previous response above, Scenarios 3 and 4 are not supposed to represent “extreme” conditions, but rather reasonable/plausible conditions within the parameters’ uncertainties. To avoid misunderstanding and to clarify that we are not using high-flow conditions, we changed the names of Scenarios 3 and 4 to “*Low-end case, average flow*” and “*High-end case, low flow*”.

### **R3-C6**

***The choice of using or not MECs below detection limit for validation is contradicted a couple of time in the MS. I would describe it better and univocally in the methodology section. In my opinion, MECs below detection limit are still important for model validation.***

A: We apologize for not being clear when introducing the methodology associated with the selection of MECs. In the revised manuscript, we moved the following statement from line 558 to line 416:

*“In addition to the 227 MECs, 134 measurements were classified as ‘not detected’ or ‘not quantified.’ To evaluate these cases, PECs at the same locations were verified to determine if they were correctly predicted to be below the detection or quantification limit (LOD or LOQ, respectively), depending on the limit reported by the study.”*

Furthermore, line 560 was corrected to:

*“For PECs at the same locations as MECs that were reported to be below detection, 60% were correctly predicted to have concentrations that fall below the detection limit. If allowing an error of one order of magnitude, the success rate increased to 93%.”*

We also corrected the statement appearing at line 515:

*“Modelling results were evaluated by comparing predicted SMX concentrations with available measurements in river reaches across the world using 227 MECs with values above the detection threshold and 134 measurements below detection.”*

### **R3-C7**

***You accounted the uncertainty in model prediction due to discharge condition into your PECs. If you include it again in MECs, it means that you are considering this uncertainty twice, which is not correct.***

A: After due reflection and consideration, we respectfully disagree with this assertion. It is important to note that the uncertainties depicted in panel b of Figure 5 pertain to MEC uncertainties, rather than being indicative of model uncertainties. The purpose of including this graph was to illustrate how unknown characteristics specific to MECs might contribute to disparities between MECs and PECs at the same location. Such disparities should not be categorized as model uncertainties.

Nevertheless, in order to provide greater clarity on this matter, we have relocated panel b from Figure 5 (Section 4.4) to the Discussion section (Section 5.2), along with its accompanying explanation. This adjustment aims to facilitate a clearer differentiation between uncertainties related to model predictions and those associated with the evaluation data.

### **Discussion**

### **R3-C8**

***I would appreciate a deeper discussion on the quality prediction (i.e. on NRMSE, NSE, PBIAS, KGE parameters). Are they expressing a good or bad prediction performance of your model? How do they compare with other similar large scale models performance? Is it an acceptable performance for predicting contaminants at global scale?***

A: We agree that the goodness-of-fit indicators should be further discussed and, as such, we revised the text appearing at line 642:

*“The results showed an overall reasonable predictive capability with the goodness-of-fit indicators NSE and KGE above 0.6, and with 79% of PECs being within one order of magnitude of reported MECs. This was despite the inherent uncertainties associated with assumptions made in the development of the model and those associated with estimates of the various model parameters and input datasets. Unfortunately, the lack of specificity of field measurements, for which literature sources generally do not provide enough information on the precise locations of measurements nor river discharge conditions, does not allow for a conclusive evaluation of the model under different modelling scenarios. It is noted that other global water quality models, which also simulate substance loads and concentrations, have reported similar values of NSE between 0.4 and 0.71 (Font et al., 2019; Harrison et al., 2019). However, a more detailed comparison between results from these models and HydroFATE is difficult as different substances and spatial resolutions were applied.”*

**Extra comments extracted from the annotated pdf:**

***It seems that you are missing an important dataset of measurements, Wilkinson et al. (2020), <https://doi.org/10.1073/pnas.2113947119>. Above, you cited them but their database of MECs seems not in yours.***

A: The dataset by Wilkinson et al. was only released in 2022, i.e., after our data collection and implementation phase had been completed. Adding these data to our assessment would represent a major amount of work (and thus substantial delay in publishing this work) as all measurements would need to be georeferenced to our river network in a quality-controlled way before being assessed. Hence, we refrained from utilizing these new data at this stage. However, we do understand the value of these additional data and plan to use them in the future.

***I do not understand how width and discharge would help you in locate the MECs points.***

A: The river network does not always match the exact location in reality, and the coordinates of MECs are not always precise. Therefore, river characteristics such as discharge and width can help differentiate between different rivers. For example, at a river confluence the MEC may be recorded to fall between the main river and a small tributary. If discharge or width of the measurement location were known, the correct river could be more easily determined.

***Why not using high-flow to account for low-end case?***

A: High flows as long-term monthly averages are not as meaningful for risk assessments. Nonetheless, we changed the scenario denomination and hope it is clearer now (see Response R3-C5).

**References**

Grill, G., Li, J., Khan, U., Zhong, Y., Lehner, B., Nicell, J., and Ariwi, J.: Estimating the ecotoxicological risk of estrogens in China's rivers using a high-resolution contaminant fate model, *Water Research*, 145, 707-720, doi: 10.1016/j.watres.2018.08.053, 2018.

Wilkinson, J. L., Boxall, A. B. A., Kolpin, D. W., Leung, K. M. Y., Lai, R. W. S., Galbán-Malagón, C., Adell, A. D., Mondon, J., Metian, M., Marchant, R. A., Bouzas-Monroy, A., Cuni-Sanchez, A., Coors, A., Carriquiriborde, P., Rojo, M., Gordon, C., Cara, M., Moermond, M., Luarte, T., . . . Teta, C. Pharmaceutical pollution of the world's rivers. *Proceedings of the National Academy of Sciences*, 119(8), e2113947119. doi:10.1073/pnas.2113947119, 2022.
